# Supplementary material
Source: PubMed Central journal article supplement (PMC4460832)

**Supplemental Figure 1.** UVPD spectrum of singly deprotonated TSTEPQyQPGENL.

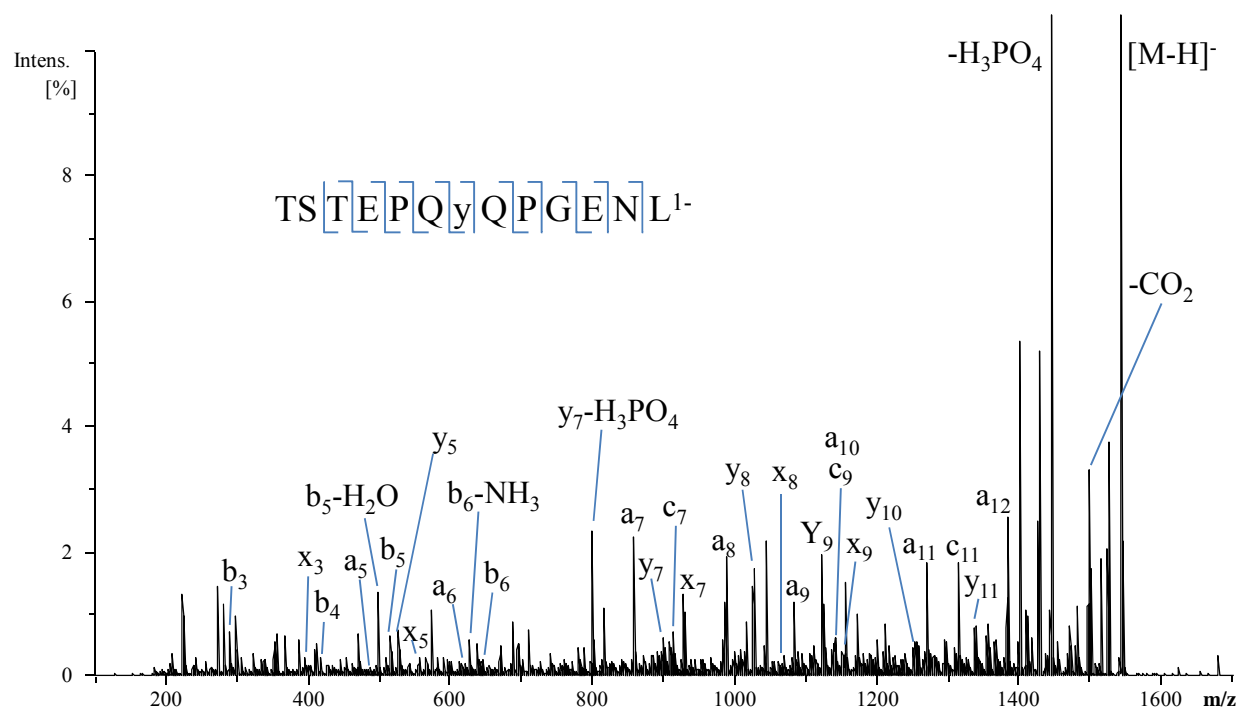

Supplement: NIHMS694779-supplement-supplement_1.pdf [file NIHMS694779-supplement-supplement_1.pdf]
